# Supplementary material for: Multiple Forms of Neural Cell Death in the Cyclical Brain Degeneration of A Colonial Chordate
Source: Cells. 2023 Mar 29;12(7):1041. doi: 10.3390/cells12071041 (PMC10093557; doi:10.3390/cells12071041)
Supplement: Supplementary file 1 [file cells-12-01041-s001.zip › cells-2274665-Tables S1-S5.xlsx]

## Sheet: Guide
Supplementary Table 1: List of genes involved in human neuronal death
Supplementary Table 2: List of genes involved in human prion disease
Supplementary Table 3: Differentially expressed genes associated with neuron death pathway between zooids in late cycle and takeover
Supplementary Table 4: Differentially expressed genes associated with neuron death pathway between zooids and buds in takeover
Supplementary Table 5: Relevant genes involved in neuronal death differentially expressed in adult in the filter feeding adult vs adult in TO and in adults in takeover vs bud

## Sheet: Table S1
Gene name
ACACA
ACIN1
ADD1
AKT1
AKT1S1
AKT2
AKT3
AMBRA1
APAF1
APC
APIP
APPL1
ARHGAP10
ATG10
ATG101
ATG12
ATG13
ATG14
ATG16L1
ATG16L2
ATG2A
ATG3
ATG4A
ATG5
ATG7
ATG9A
ATG9B
ATP13A2
AVEN
BAD
BAK1
BAX
BBC3
BCAP31
BCL2
BCL2L1
BCL2L11
BECN1
BID
BIRC2
BIRC3
BMF
BMX
C19orf12
C1QBP
CARD8
CASP1
CASP3
CASP4
CASP5
CASP6
CASP7
CASP8
CASP9
CD14
CDC37
CDH1
CDKN2A
CFLAR
CHAF1A
CHMP2A
CHMP2B
CHMP3
CHMP4A
CHMP4B
CHMP4C
CHMP6
CHMP7
CLSPN
COASY
CP
CTNNB1
CYCS
DAPK1
DAPK2
DAPK3
DBNL
DCAF17
DCC
DEPTOR
DFFA
DFFB
DIABLO
DIABLO
DNM1L
DSG1
DSG2
DSG3
DSP
DYNLL1
DYNLL2
E2F1
ELANE
FA2H
FADD
FAS
FASLG
FLOT1
FLOT2
FNTA
FTL
GAS2
GSDMD
GSDME
GSN
GTPBP2
GZMB
H1-0
H1-1
H1-2
H1-3
H1-4
H1-5
HMGB1
HMGB2
HSP90AA1
IL18
IL1A
IL1B
INS
INSR
IRF1
IRF2
KPNA1
KPNB1
LMNA
LMNB1
LY96
MAGED1
MAP1LC3A
MAP1LC3B
MAPK1
MAPK3
MAPK8
MAPT
MECP2
MLKL
MLST8
MTOR
NMT1
OCLN
OGT
OMA1
OPA1
PAK2
PANK2
PDCD6IP
PELI1
PIK3C3
PIK3R4
PKP1
PLA2G6
PLEC
PMAIP1
PPP1R13B
PPP3CC
PPP3R1
PRKAA1
PRKAA2
PRKAB1
PRKAB2
PRKAG1
PRKAG2
PRKAG3
PRKCD
PRKCQ
PSMA1
PSMA2
PSMA3
PSMA4
PSMA5
PSMA6
PSMA7
PSMA8
PSMB1
PSMB10
PSMB11
PSMB2
PSMB3
PSMB4
PSMB5
PSMB6
PSMB7
PSMB8
PSMB9
PSMC1
PSMC2
PSMC3
PSMC4
PSMC5
PSMC6
PSMD1
PSMD10
PSMD11
PSMD12
PSMD13
PSMD14
PSMD2
PSMD3
PSMD4
PSMD5
PSMD6
PSMD7
PSMD8
PSMD9
PSME1
PSME2
PSME3
PSME4
PSMF1
PTK2
RB1CC1
RHEB
RIPK1
RIPK3
RNF103-CHMP3
ROCK1
RPS27A
RPTOR
SATB1
SCP2
SDCBP
SEM1
SEPTIN4
SFN
SH3GLB1
SPTAN1
SPTLC1
STAT3
STK11
STK24
STK26
STUB1
TFDP1
TFDP2
TICAM1
TICAM2
TJP1
TJP2
TLR4
TMED7-TICAM2
TNFRSF10A
TNFRSF10B
TNFSF10
TP53
TP53BP2
TP63
TP73
TRADD
TRAF2
TSC1
TSC2
UACA
UBA52
UBB
UBC
ULK1
ULK2
UNC5A
UNC5B
UVRAG
VIM
VMP1
WDR45
WIPI1
WIPI2
XIAP
YWHAB
YWHAE
YWHAG
YWHAH
YWHAQ
YWHAZ
ZFYVE1
API5
PLK1
GCLC
SIX1
GAPDH1
AIM1
AIM2
SET
AGA
GBA
IDS
SGSH
GUSB
FUCA1
GLB1
NEU1
NAGLU
IDUA
ARSA
ARSB
CTNS
HGSNAT
CLN3
TPP1
CTSA
MAN2B1
MANBA
HEXA
HEXB
GALNS
GALC
GAA
SMPD1
GLA
MCOLN1
CHIT1
M6PR
PPT1
SUMF1
NPC1
CLN6
LIPA
PSAP
CLN5
GM2A
NAGA
GNS
CLCN7
HYAL1
CLCN6
ARSH
CTSD
SLC44A4
SV2A
CTSB
MIR122
MIR199A1
MIR192
MIR21
GPT
SREBF1
INS
CCR6
PNPLA3
PPARA
ADIPOQ
NPC2
NR1H4
LEP
PPARG
H2AC18
TNF
IL6
MIR33B
TM6SF2
TBCK
ALB
CYP2E1
FGF21

## Sheet: Table S2
Gene name
APP
BATF
BCL11A
BCL2
CASP12
CASP3
CHD2
CLU
CTCF
EBF1
ELK1
EP300
FGFR1
FPR2
FYN
HSP90B1
HSPA5
IRF4
MAPK1
MAPK3
MAPT
MEF2C
MIR132
MIR136
MIR142
MIR21
MIR342
MIR9-1
MIRLET7I
MSMB
NCAM1
NFKB1
PAX5
PDIA3
POU2F2
PRNP
PSEN1
PSEN2
PTK2
RAD21
RFX5
RPSA
RXRA
SERPINA3
SMC3
SNAP25
SNCA
SPI1
SPRN
STAT3
TBP

## Sheet: Table S3
GENE	baseMean	log2FoldChange	lfcSE	stat	pvalue	padj	NAME
g10888.t1	6.85395	-4.62174	2.20585	-2.09522	0.0361516	0.116872	PLK1
g12318.t1	8.06169	-4.84654	2.21526	-2.18779	0.0286846	0.104423	PSME3
g12957.t1	7.45725	-4.73492	2.21285	-2.13974	0.0323762	0.1104	PSMA3
g13963.t1	76.2019	-8.09508	1.8085	-4.47612	7.60108e-06	0.000761601	YWHAB
g14394.t1	60.8576	-2.63599	1.14909	-2.29399	0.0217913	0.0904023	SREBF1
g14902.t1	9.22178	-5.05259	2.12986	-2.37226	0.0176797	0.0816803	LMNA
g14939.t1	9.14067	-5.0409	2.15799	-2.33593	0.0194951	0.0853586	SPTAN1
g15186.t1	18.3999	-3.10211	1.57875	-1.96492	0.0494237	0.135953	SET
g16251.t1	13.9223	-5.64176	1.98242	-2.8459	0.00442865	0.0406696	PSMC1
g17591.t1	7.37566	-4.73299	2.27944	-2.07639	0.0378583	0.119372	PRKAA2
g17848.t1	9.06398	-5.02474	2.10401	-2.38817	0.0169326	0.0801311	PSMD1
g1965.t1	9.32507	-5.06311	2.08996	-2.42259	0.0154101	0.076472	PSMC3
g19763.t1	6.88676	-4.63315	2.2573	-2.05252	0.0401187	0.122407	ATG3
g24138.t1	18.2802	-6.03761	1.95296	-3.09152	0.00199138	0.0259091	RPS27A
g26823.t1	7.85673	-4.8162	2.14809	-2.24209	0.0249558	0.097478	YWHAE
g26893.t1	13.1296	-5.55982	2.00796	-2.76889	0.00562471	0.0458391	PPP3R1
g28990.t1	7.93735	-4.83854	2.40148	-2.01481	0.0439242	0.128464	BIRC3
g29234.t1	9.1906	-5.03918	2.10862	-2.3898	0.0168575	0.0799554	PSMC4
g30711.t1	7.66449	-4.77869	2.16069	-2.21165	0.026991	0.10195	CTSA
g31883.t1	6.92004	-4.63058	2.20307	-2.10187	0.0355646	0.115619	C1QBP
g32829.t1	22.7624	-6.35157	1.89451	-3.35262	0.000800494	0.0151561	DYNLL2
g33523.t1	14.1589	-5.66219	2.01181	-2.81447	0.00488574	0.0429685	API5
g337.t1	12.0251	-5.43468	2.05016	-2.65086	0.00802865	0.0546377	PSMD14
g34696.t1	22.4063	-6.33049	1.91286	-3.30943	0.000934857	0.0161984	XIAP
g36039.t1	16.5332	-3.54189	1.7152	-2.06501	0.0389224	0.120927	ACACA
g36539.t1	24.8588	-3.55611	1.48772	-2.3903	0.0168344	0.0799504	WIPI2
g3751.t1	8.49119	-4.93098	2.12779	-2.31742	0.0204811	0.0875291	PSMD3
g37619.t1	8.96786	-5.00869	2.10472	-2.37975	0.0173245	0.0810484	PRKCQ
g39566.t1	111.063	-2.89316	1.07617	-2.68838	0.0071799	0.051915	CTNNB1
g4117.t1	11.4612	-5.35749	2.05106	-2.61205	0.00900007	0.0575618	PSMC2
g41938.t1	14.6653	-3.353	1.70962	-1.96125	0.0498496	0.136509	GTPBP2
g43714.t1	8.77954	-4.98106	2.13435	-2.33376	0.0196081	0.0855531	GCLC
g45223.t1	30.0154	-6.75274	1.90425	-3.54615	0.000390903	0.0102493	GSN
g47081.t1	23.2236	-6.38219	1.90908	-3.34308	0.000828553	0.0153146	PDCD6IP
g47375.t1	9.95236	-5.164	2.16242	-2.38806	0.0169374	0.0801311	YWHAG
g47424.t1	10.0601	-5.17011	2.07753	-2.48859	0.0128251	0.0689617	RB1CC1
g4758.t1	43.2667	-7.27997	1.90398	-3.82355	0.000131546	0.00536802	SIX1
g48061.t1	227.071	-2.30093	0.951122	-2.41918	0.0155556	0.0766373	UBB
g50327.t1	6.12337	-4.45405	2.25478	-1.97538	0.0482251	0.13405	PLA2G6
g51504.t1	14.4329	-5.69737	2.00292	-2.84452	0.00444777	0.0407452	FLOT1
g52324.t1	11.0062	-5.30384	2.04255	-2.59668	0.00941301	0.058694	PSMA8
g53937.t1	35.0919	-6.97459	1.84844	-3.77323	0.000161146	0.0059852	NPC1
g54405.t1	14.1846	-5.66991	1.98081	-2.86241	0.00420432	0.0394489	PSMA4
g56049.t1	8.72618	-4.9678	2.11135	-2.3529	0.0186277	0.0834156	PSMD13
g57768.t1	22.3768	-6.32498	1.90281	-3.32402	0.000887287	0.0157658	PRKAG2
g58942.t1	10.2918	-5.21013	2.08667	-2.49686	0.0125299	0.0681583	PRKCD
g59673.t1	111.372	-2.31589	1.06358	-2.17745	0.0294469	0.105701	PLEC
g60494.t1	34.4318	-2.38017	1.20039	-1.98283	0.0473859	0.132775	MAPK1
g60927.t1	6.95562	-4.64227	2.19724	-2.11277	0.0346202	0.114032	PSMD11
g60953.t1	11.1178	-5.31282	2.0706	-2.56583	0.0102928	0.0613088	PSMD6
g61554.t1	43.4175	-3.99012	1.38706	-2.87667	0.00401893	0.0387794	UBA52
g65251.t1	50.6267	-5.19058	1.51616	-3.4235	0.0006182	0.0130128	VIM
g6698.t1	61.2806	-3.92734	1.29877	-3.02389	0.00249546	0.0294076	INSR
g67294.t1	7.22618	-4.69807	2.18509	-2.15006	0.0315504	0.109008	DNM1L
g67511.t1	120.561	-4.93605	1.25286	-3.93983	8.15405e-05	0.00412183	HSP90AA1
g69148.t1	169.489	-4.58568	1.14182	-4.01613	5.91624e-05	0.00333727	CASP8
g69264.t1	30.3704	-3.1617	1.37149	-2.30531	0.0211494	0.0888907	LMNB1
g69985.t1	9.95954	-5.1603	2.07333	-2.4889	0.012814	0.0689617	PSMB5
g71029.t1	7.78232	-4.80847	2.19337	-2.19227	0.0283597	0.103962	PIK3R4
g7149.t1	15.5274	-5.80407	2.03789	-2.84808	0.00439844	0.0405363	BIRC2
g7360.t1	10.1079	-5.18174	2.0695	-2.50386	0.0122846	0.0673134	PSMD2
g7656.t1	7.6534	-4.77955	2.15871	-2.21407	0.0268237	0.101553	CLCN7
g7967.t1	7.29896	-4.71299	2.18359	-2.15836	0.0308996	0.107956	PSMD12
g8625.t1	7.99119	-4.8443	2.15466	-2.2483	0.0245574	0.0965602	PSMA5
g9434.t1	81.333	-5.88231	1.48995	-3.94798	7.88133e-05	0.00403341	OGT
g9582.t1	26.999	-6.59543	1.88721	-3.49481	0.000474408	0.0111377	PSMB4
g9654.t1	11.594	-5.38009	2.03507	-2.64369	0.00820088	0.0553089	AMBRA1
g9831.t1	6.67004	-4.5778	2.21668	-2.06516	0.038908	0.120927	CASP9
GENE	baseMean	log2FoldChange	lfcSE	stat	pvalue	padj	NAME.x
g10503.t1	109.614	7.12503	1.11045	6.41633	1.39597e-10	4.42715e-07	CP
g11647.t1	116.891	3.26125	0.993667	3.28204	0.00103059	0.0169828	CASP7
g15462.t1	3.99068	7.15995	2.77808	2.57731	0.00995738	NA	STK11
g19842.t1	130.482	3.14884	1.16534	2.70208	0.00689072	0.0506071	CTSD
g31036.t1	4.65966	5.32381	2.43174	2.1893	0.0285748	NA	MLST8
g42275.t1	15.8686	5.10635	1.51342	3.37404	0.000740739	0.0144636	CHIT1

## Sheet: Table S4
GENE	baseMean	log2FoldChange	lfcSE	stat	pvalue	padj	NAME
g10503.t1	69.6339	-5.26596	1.83584	-2.86842	0.00412528	0.182367	CP
g11647.t1	68.0136	-4.74662	2.01517	-2.35544	0.0185007	0.230078	CASP7
g19842.t1	73.0228	-8.9118	2.11625	-4.21113	2.54095e-05	0.0203976	CTSD
g324.t1	8.56527	-7.14624	2.57072	-2.77986	0.00543819	0.202428	UBB
g51333.t1	20.4718	-6.45099	2.18079	-2.9581	0.00309543	0.158041	BIRC3
g57666.t1	17.1977	-4.32129	2.16672	-1.99439	0.0461089	0.274934	XIAP
GENE	baseMean	log2FoldChange	lfcSE	stat	pvalue	padj	NAME.x
g13963.t1	12.5533	6.16748	2.59844	2.37353	0.017619	0.228104	YWHAB
g24138.t1	13.5546	6.27219	2.61446	2.39904	0.0164382	0.226018	RPS27A
g31883.t1	10.2575	5.86477	2.67532	2.19218	0.0283668	0.250198	C1QBP
g32829.t1	8.91963	5.68145	2.66103	2.13506	0.0327561	0.251507	DYNLL2
g33523.t1	8.45995	5.58127	2.73424	2.04125	0.041226	0.258856	API5
g337.t1	9.08607	5.68951	2.69356	2.11226	0.0346638	0.251507	PSMD14
g4117.t1	8.28106	5.54881	2.7489	2.01856	0.0435334	0.267019	PSMC2
g4758.t1	15.2838	6.45107	2.5721	2.50809	0.0121384	0.220546	SIX1
g49563.t1	15.4801	6.46318	2.61681	2.46987	0.0135162	0.222113	PSMA3
g54405.t1	18.6579	6.73556	2.58413	2.60651	0.00914708	0.207949	PSMA4
g61554.t1	37.0305	4.54865	2.18573	2.08106	0.0374281	0.256843	UBA52
g65251.t1	22.0732	4.76012	2.23983	2.12522	0.0335686	0.251507	VIM
g67511.t1	150.903	6.05537	2.08911	2.89854	0.0037491	0.169881	HSP90AA1
g9582.t1	9.71219	5.7901	2.66407	2.17341	0.0297497	0.251507	PSMB4

## Sheet: Table S5
Neural death pathway	Neural death subpathway	Gene name	Gene function	Gene expression (adults in late cycle vs adults in TO)	Gene expression (adults in TO vs bud in TO)
programmed cell death	Intrinsic apoptosis	XIAP	apoptotic suppressor protein	highly expressd in late cycle than TO	highly expressd in the adults than bud
programmed cell death	Intrinsic apoptosis	MAPK1	regulation of the endosomal dynamics, including lysosome processing and endosome cycling. Its substrates include apoptosis regulators (such as BAD, BTG2, CASP9, DAPK1, IER3, MCL1 or PPARG)	highly expressd in late cycle than TO	no DE
programmed cell death	Intrinsic apoptosis, necroptosis	YWHAG	regulation of many vital cellular processes such as metabolism, protein trafficking, signal transduction, apoptosis and cell cycle regulation	highly expressd in late cycle than TO	no DE
programmed cell death	Intrinsic apoptosis	YWHAB	it blocks the nuclear translocation of the phosphorylated form (by AKT1) of SRPK2 and antagonizes its stimulatory effect on cyclin D1 expression resulting in blockage of neuronal apoptosis elicited by SRPK2	highly expressd in late cycle than TO	no DE
programmed cell death, regulated necrosis	extrinsic apoptosis,	CASP 9	This protein is thought to play a central role in apoptosis and to be a tumor suppressor.	highly expressd in late cycle than TO	no DE
programmed cell death, regulated necrosis	necroptosis	BIRC2-3	member of IAP family of proteins that inhibit apoptosis	highly expressd in late cycle than TO	BIRC3 is highly expressd in the adults than bud
programmed cell death, regulated necrosis	necroptosis	FLOT1	this protein plays a role in vesicle trafficking and cell morphology	highly expressd in late cycle than TO	no DE
programmed cell death	necroptosis	PDCD6IP	Programmed Cell Death 6 Interacting Protein. Overexpression of this protein can block apoptosis	highly expressd in late cycle than TO	no DE
programmed cell death		API5	Encodes an apoptosis inhibitory protein whose expression prevents apoptosis.	highly expressd in late cycle than TO	highly expressd in the bud than adult
programmed cell death		PLK1	Highly expressed during mitosis and elevated levels are found in many different types of cancer. Depletion of this protein in cancer cells dramatically inhibited cell proliferation and induced apoptosis	highly expressd in late cycle than TO	no DE
programmed cell death		SIX1	It is a transcriptional factor involved in the regulation of cell proliferation, apoptosis and embryonic development.	highly expressd in late cycle than TO	no DE
programmed cell death		SET	Multitasking protein, involved in apoptosis, transcription, nucleosome assembly and histone chaperoning.	highly expressd in late cycle than TO	no DE
programmed cell death, regulated necrosis	necroptosis	OGT	The mitochondrial isoform (mOGT) is cytotoxic and triggers apoptosis in several cell types	highly expressd in late cycle than TO	no DE
regulated necrossis	lysosomal cell death	CTSD	Cathepsins D	highly expressed in TO zooids	highly expressd in the adults than bud
		CHIT1	Chitinase 1	highly expressed in TO zooid	no DE
		CTSA	Cathepsins are a group of lysosomal proteases that have a key role in cellular protein turnover.	highly expressd in late cycle than TO	no DE
		NPC1	This gene encodes a large protein that resides in the limiting membrane of endosomes and lysosomes and mediates intracellular cholesterol trafficking	highly expressd in late cycle than TO	no DE
		CLCN7	it functions as antiporter and contributes to the acidification of the lysosome lumen and may be involved in maintaining lysosomal pH	highly expressd in late cycle than TO	no DE
Authophagy		PRKAA1	protein kinase	highly expressd in late cycle than TO	no DE
		ATG3	autophagy related 3. This protein is known to play a role in regulation of autophagy during cell death.	highly expressd in late cycle than TO	no DE
		INSR	insulin receptor	highly expressd in late cycle than TO	no DE
		AMBRA1	Involved in macroautophagy	highly expressd in late cycle than TO	no DE
		CP		no DE	highly expressd in the adults than bud
